# Supplementary material for: Repeated response execution and inhibition alter subjective preferences but do not affect automatic approach and avoidance tendencies toward an object
Source: PeerJ. 2023 Oct 10;11:e16275. doi: 10.7717/peerj.16275 (PMC10573286; doi:10.7717/peerj.16275)
Supplement: Supplemental Information 1 [file peerj-11-16275-s001.xlsx]

## Sheet: Sheet1
ID	Order	Age	Sex	hand	Condition	Go_correct(%)	NoGo_correct(%)	Go_correct_RT	PrimedApproach_error(%)	PrimedAvoidance_error(%)	NeutralApproach_error(%)	NeutralAvoidance_error(%)	PrimedApproach_RT1	PrimedAvoidance_RT1	Approach-Avoidance Index(Primed, RT1)	NeutralApproach_RT1	NeutralAvoidance_RT1	Approach-Avoidance Index(Neutral, RT1)	PrimedApproach_RT3	PrimedAvoidance_RT3	Approach-Avoidance Index(Primed, RT3)	NeutralApproach_RT3	NeutralAvoidance_RT3	Approach-Avoidance Index(Neutral, RT3)	VAS(Go-primed)	VAS(Neutral)	VAS(NoGo-primed)
19	N-C-I	39	M	RR	NOGO	100	100	373.494	0	3.125	3.125	3.125	680	659.71	-20.2903	599.645	682.806	83.1613	969.312	981	11.6875	919.484	982.452	62.9677	6	6	5
43	N-C-I	40	F	RR	NOGO	100	99.375	467.55	0	3.125	9.375	0	431.031	487.129	56.0978	468	487.406	19.4062	739.469	789.129	49.6603	770.276	804.219	33.9429	3	4	3
37	G-C-I	50	M	RR	GO	99.375	100	487.654	3.125	6.25	6.25	9.375	598.839	801.367	202.528	724.2	581.345	-142.855	949.032	1147.4	198.368	1061.77	906.241	-155.525	5	4	6
30	G-I-C	36	M	RR	GO	100	100	430.744	0	0	0	0	513.062	556.188	43.125	519.719	572.031	52.3125	946.406	1002.53	56.125	971.188	1029.03	57.8438	5	5	4
44	N-I-C	47	M	RR	NOGO	99.375	98.125	342.025	9.375	3.125	3.125	6.25	699.655	654.129	-45.5261	596	681.333	85.3333	988.931	952.871	-36.0601	887.484	1005.97	118.483	6	7	5
26	G-I-C	37	M	RR	GO	100	100	401.131	0	6.25	6.25	3.125	543.969	565.9	21.9312	577.133	565.226	-11.9075	875.688	893	17.3125	909.1	895.258	-13.8419	3	5	6
46	G-I-C	43	M	RR	GO	100	100	442.144	0	0	3.125	3.125	515.625	638.594	122.969	590.839	615.935	25.0968	861.719	972.906	111.188	922.129	962.935	40.8065	4	5	4
25	G-C-I	39	M	RR	GO	100	100	411.837	0	3.125	0	0	458.75	411.194	-47.5565	436.844	475.875	39.0312	775.188	739.387	-35.8004	764.156	793.625	29.4688	7	6	2
29	G-C-I	50	M	RR	GO	100	98.125	390.738	0	0	3.125	0	618.344	574.656	-43.6875	472.645	622.094	149.449	1019.31	959.406	-59.9062	858.419	1018.38	159.956	5	5	4
83	N-C-I	45	M	RR	NOGO	100	100	388.469	0	0	0	3.125	392.656	399.594	6.9375	291.094	443.226	152.132	683.25	653.312	-29.9375	551.531	742.452	190.92	5	5	4
82	G-I-C	35	M	LL	GO	100	100	409.788	0	3.125	0	3.125	530.75	581.645	50.8952	488.812	681.419	192.607	853.344	918.194	64.8498	823.062	1002.06	179.002	5	3	3
55	N-C-I	48	M	RR	NOGO	100	100	416.406	0	0	0	0	676.781	583.469	-93.3125	521.969	672.344	150.375	1052.91	928.219	-124.688	880.562	1043.62	163.062	4	5	5
54	G-I-C	40	M	RR	GO	98.125	98.125	419.599	3.125	6.25	0	3.125	518.935	572.533	53.5978	501.719	604.742	103.023	854.29	945.867	91.5763	862.156	952.968	90.8115	4	4	3
53	G-C-I	39	F	RR	GO	100	100	405.444	0	0	3.125	0	621.344	725	103.656	671.226	698.938	27.7117	990.531	1101.16	110.625	1054.77	1075.09	20.3196	3	4	5
59	N-C-I	50	M	RR	NOGO	100	100	468.019	0	0	0	0	625.781	686.719	60.9375	684.375	764.094	79.7188	1130.41	1187.81	57.4062	1169.22	1281.47	112.25	4	3	5
58	G-I-C	34	M	RR	GO	100	100	378.744	0	0	0	0	468.375	562.812	94.4375	493.312	575.188	81.875	905.906	1044.81	138.906	981.719	997.5	15.7812	5	3	4
98	G-I-C	36	M	RR	GO	98.75	98.75	453.671	3.125	3.125	0	6.25	596	741.581	145.581	766.312	553.967	-212.346	938.839	1078.61	139.774	1100.38	896.6	-203.775	4	4	4
121	G-C-I	36	M	RR	GO	100	100	350.056	0	0	0	0	410.156	379.25	-30.9062	386.344	436.906	50.5625	845.938	778.344	-67.5938	788.094	874	85.9062	6	2	3
103	N-C-I	25	F	LR	NOGO	100	100	402.113	15.625	25	6.25	6.25	778.37	782.667	4.2963	787.167	874.567	87.4	1312.26	1246.29	-65.9676	1275.1	1507.63	232.533	5	5	2
92	N-I-C	51	M	RR	NOGO	100	100	408.05	6.25	3.125	0	0	840.733	826.065	-14.6688	876.344	916.062	39.7188	1287.9	1273	-14.9	1330.41	1352.16	21.75	2	2	3
72	N-I-C	56	F	RR	NOGO	100	99.375	358.131	0	0	6.25	3.125	521.844	567.938	46.0938	609.933	560.516	-49.4172	921.344	956.875	35.5312	990.633	970.484	-20.1495	4	6	5
74	G-I-C	44	M	RR	GO	100	99.375	356.844	0	0	0	3.125	444.469	688.531	244.062	721.125	589	-132.125	735.906	1004.62	268.719	1040.62	892.839	-147.786	6	2	4
136	N-I-C	46	M	RR	NOGO	100	100	460.275	0	0	3.125	0	522.312	484.844	-37.4688	430.129	554.375	124.246	828.781	788.719	-40.0625	741.742	861.156	119.414	2	4	3
132	N-I-C	49	M	RR	NOGO	100	100	427.863	0	3.125	0	0	419.25	518.935	99.6855	430.875	457.438	26.5625	769.469	864.645	95.1764	806.688	794.219	-12.4688	4	5	3
152	N-I-C	34	M	RR	NOGO	100	99.375	353.55	15.625	9.375	3.125	9.375	487.519	387.759	-99.7599	384.645	413.931	29.2859	810.926	701.759	-109.167	694.419	728.379	33.96	3	4	4
73	G-C-I	23	M	RR	GO	99.375	100	393.61	3.125	0	0	6.25	485.677	504.688	19.0101	443.625	442.533	-1.09167	793	800.656	7.65625	740.938	751.433	10.4958	7	1	4
122	G-I-C	43	F	RR	GO	100	99.375	431.163	3.125	9.375	0	6.25	629.129	629.862	0.733037	672.562	682.033	9.47083	957.548	978.552	21.0033	1036.34	1030.43	-5.91042	3	3	2
129	G-C-I	38	F	LR	GO	100	100	306.756	3.125	6.25	3.125	0	355.419	349	-6.41935	355.387	402.594	47.2067	746.839	732.1	-14.7387	743.839	792.469	48.63	6	3	5
77	G-C-I	55	M	RR	GO	100	100	454.531	3.125	6.25	3.125	3.125	980.484	915	-65.4839	895.968	902.419	6.45161	1400.16	1348.2	-51.9613	1374.06	1316.03	-58.0323	4	6	5
108	N-I-C	50	M	RR	NOGO	100	100	377.569	0	0	0	3.125	573.906	597.938	24.0312	606.938	591.258	-15.6794	919.938	945.281	25.3438	962.156	950	-12.1562	4	5	3
118	G-I-C	39	M	RR	GO	100	100	471.969	6.25	3.125	0	0	810.9	730	-80.9	635.344	716.094	80.75	1248.77	1154.94	-93.8312	1064.47	1215.44	150.969	3	3	3
88	N-I-C	68	F	RR	NOGO	100	100	440.781	3.125	3.125	0	6.25	896	938.419	42.4194	955.062	957.9	2.8375	1360.9	1514.19	153.29	1519.03	1426.97	-92.0646	3	4	5
133	G-C-I	28	M	RR	GO	100	100	345.094	0	3.125	0	3.125	398.188	519.194	121.006	419.969	511.387	91.4183	730.875	857.968	127.093	757.125	849.581	92.4556	3	5	3
110	G-I-C	45	M	RR	GO	100	100	446.225	0	0	0	0	752.219	738.312	-13.9062	694.344	774.688	80.3438	1094.69	1081.81	-12.875	1033.97	1103.12	69.1562	6	5	3
109	G-C-I	41	F	RR	GO	100	100	371.731	3.125	3.125	0	0	641.774	589	-52.7742	539.594	777.75	238.156	965.548	918.484	-47.0645	845.656	1115.97	270.312	2	2	4
16	N-I-C	41	M	RR	NOGO	100	96.875	370.55	3.125	6.25	3.125	3.125	404.419	452.067	47.6473	378.129	470.032	91.9032	708.355	752.1	43.7452	679.29	769.065	89.7742	5	5	5
32	N-I-C	38	M	RR	NOGO	100	100	368.475	0	6.25	0	0	467.594	532.133	64.5396	567.312	515.875	-51.4375	799.938	860.133	60.1958	918.469	844.625	-73.8438	3	3	4
22	G-I-C	46	F	RR	GO	100	100	437.656	0	6.25	0	0	497.281	456.3	-40.9812	523.875	480.5	-43.375	890.062	850.633	-39.4292	924.875	869.719	-55.1562	3	3	3
18	G-I-C	44	F	RR	GO	100	100	442.075	0	3.125	3.125	0	712.438	815.226	102.788	676.484	755.75	79.2661	1094.56	1194.61	100.05	1056.06	1151.59	95.5292	3	4	3
34	G-I-C	32	F	RR	GO	100	100	319.562	0	0	0	0	408.656	449.5	40.8438	416.531	449.688	33.1562	749	795.594	46.5938	762.031	792.781	30.75	3	3	6
39	N-C-I	37	M	RR	NOGO	100	100	402.825	50	0	0	56.25	532.688	601.844	69.1562	624.531	563.857	-60.6741	941.188	1031.88	90.6875	1060.22	967.143	-93.0759	5	5	4
27	N-C-I	46	M	RR	NOGO	100	100	365.056	9.375	0	3.125	3.125	477.586	454.719	-22.8675	418.742	489.097	70.3548	808.138	790.312	-17.8254	754.774	823.323	68.5484	3	2	3
47	N-C-I	41	M	RR	NOGO	100	100	327.188	0	0	0	3.125	415.781	440.031	24.25	376.969	399.742	22.7732	749.469	801.531	52.0625	715.625	763.258	47.6331	4	6	3
24	N-I-C	41	M	LL	NOGO	100	100	406.425	3.125	0	3.125	3.125	576.71	708.656	131.947	632	610.516	-21.4839	900.484	1034.94	134.454	958.968	943	-15.9677	5	2	6
42	G-I-C	40	M	RR	GO	100	100	369.644	0	0	0	0	357.156	465.812	108.656	445.188	463.812	18.625	666.75	786.938	120.188	763.312	776.344	13.0312	4	5	3
41	G-C-I	40	M	RR	GO	99.375	100	343.667	0	0	0	0	399.656	390.219	-9.4375	341.969	451.875	109.906	725.688	699.344	-26.3438	677.031	774.344	97.3125	5	5	5
49	G-C-I	39	M	RR	GO	100	100	389.225	3.125	3.125	0	6.25	529.29	701.742	172.452	669.781	685.767	15.9854	939.968	1112.58	172.613	1100.53	1073.87	-26.6646	5	3	2
33	G-C-I	45	M	RR	GO	100	99.375	375.95	0	3.125	3.125	0	596.469	662.097	65.628	601.452	673.562	72.1109	948.938	1008.9	59.9657	962.935	1056.5	93.5645	5	3	4
78	G-I-C	44	M	RR	GO	100	100	395.669	0	3.125	6.25	0	500.719	648.742	148.023	515.7	567.625	51.925	878.344	1019.42	141.076	887.9	979.781	91.8813	5	4	3
21	G-C-I	54	M	RR	GO	100	99.375	421.519	0	0	0	0	510.281	499.625	-10.6562	469.031	570.625	101.594	893.312	870.938	-22.375	840.75	951.188	110.438	4	5	3
51	N-C-I	48	M	RR	NOGO	100	100	388	0	0	3.125	0	396.938	474.344	77.4062	385.452	482.938	97.4859	731.219	781.344	50.125	705.645	829	123.355	5	5	3
61	G-C-I	47	M	RR	GO	100	100	484.188	0	3.125	0	0	538.031	514.355	-23.6764	499.906	563.375	63.4688	889.312	857.355	-31.9577	846.375	919.594	73.2188	6	5	5
23	N-C-I	42	M	RR	NOGO	100	100	362.137	0	0	0	3.125	495.719	526.625	30.9062	445.969	478.419	32.4506	846.312	847.156	0.84375	774.844	817.742	42.8982	5	4	5
86	G-I-C	47	M	RR	GO	100	100	359.525	0	6.25	0	0	334.344	391.2	56.8562	357.781	438.312	80.5312	695.906	750.2	54.2938	711.25	809.969	98.7188	5	4	3
62	G-I-C	45	M	RR	GO	100	99.375	335.637	3.125	6.25	0	0	487.258	456.2	-31.0581	438.375	516.062	77.6875	793.387	734.367	-59.0204	723.156	792.812	69.6562	5	4	2
48	N-I-C	61	F	RR	NOGO	99.375	100	503.635	0	0	3.125	0	554.219	566.062	11.8438	787.71	638.969	-148.741	951.188	959.375	8.1875	1185	1034.25	-150.75	6	2	4
104	N-I-C	49	M	RR	NOGO	100	100	456.175	3.125	0	0	0	485.71	533.25	47.5403	433.406	567.688	134.281	933.032	965.906	32.874	855.312	1012.97	157.656	1	5	3
60	N-I-C	66	M	RR	NOGO	99.375	100	459.78	6.25	0	0	0	614.533	876	261.467	790.031	788.094	-1.9375	973.967	1230.34	256.377	1142.62	1163	20.375	4	2	5
70	G-I-C	43	M	RR	GO	100	100	383.3	3.125	0	3.125	0	512.774	516.594	3.81956	444.452	589.938	145.486	852.355	849.781	-2.57359	773.387	932.281	158.894	5	3	3
20	N-I-C	31	F	RR	NOGO	100	99.375	380	3.125	0	3.125	3.125	618.323	659.438	41.1149	529.968	663.581	133.613	1079.19	1090.75	11.5565	952.032	1073.94	121.903	4	6	6
95	N-C-I	40	F	RR	NOGO	100	99.375	380.644	0	6.25	3.125	3.125	652.5	677.533	25.0333	486.903	709.71	222.806	995.125	1013.4	18.275	833.71	1047.58	213.871	5	4	2
124	N-I-C	30	M	LR	NOGO	100	99.375	387.256	0	0	0	0	495.094	461.938	-33.1562	441.938	514.094	72.1562	849.969	804.312	-45.6562	783.562	895.875	112.312	4	4	4
113	G-C-I	42	F	RR	GO	100	100	385.956	0	0	0	0	550.844	456.281	-94.5625	433.094	510.375	77.2812	906.156	822.094	-84.0625	782.562	865.25	82.6875	7	6	4
114	G-I-C	35	F	RR	GO	100	99.375	380.106	0	0	3.125	3.125	446.75	581.469	134.719	494.161	579.516	85.3548	874.969	1036.38	161.406	945.161	1002.1	56.9355	3	3	5
90	G-I-C	45	F	RR	GO	100	99.375	350.181	3.125	0	0	9.375	564.903	583.094	18.1905	529.719	516.069	-13.6498	918.452	973.781	55.3296	924.094	875.759	-48.3351	5	3	4
65	G-C-I	48	M	RR	GO	100	100	359.637	0	0	0	3.125	798.719	680.844	-117.875	698.969	766.194	67.2248	1155.38	1002.62	-152.75	1007.91	1128.1	120.191	4	6	5
84	N-I-C	52	F	RR	NOGO	100	100	378.7	0	0	3.125	0	524.594	549.125	24.5312	471.032	486.594	15.5615	860.312	866.844	6.53125	784.355	824.469	40.1139	2	6	4
115	N-C-I	42	M	RR	NOGO	100	100	363.288	0	0	0	6.25	385.094	496.781	111.688	423.906	496.867	72.9604	669.531	764.312	94.7812	726.25	808.433	82.1833	5	4	6
71	N-C-I	46	M	RR	NOGO	100	100	343.113	3.125	0	3.125	3.125	528.774	546.344	17.5696	609.839	562.581	-47.2581	869.613	874.656	5.04335	914.226	918.774	4.54839	4	6	2
120	N-I-C	31	M	RR	NOGO	100	100	371.469	0	0	0	0	326.344	406.312	79.9688	377.375	378.219	0.84375	628.938	715.906	86.9688	684.375	680.969	-3.40625	7	2	6
15	N-C-I	31	M	RR	NOGO	100	99.375	414.894	0	0	3.125	3.125	492.688	733.406	240.719	603.484	621.742	18.2581	909.375	1137.59	228.219	1023.42	1042.71	19.2903	4	4	4
99	N-C-I	54	M	RR	NOGO	100	100	499.613	0	0	0	0	632.438	563.656	-68.7812	533.344	555.688	22.3438	983.031	949.562	-33.4688	916.344	908.188	-8.15625	6	5	3
123	N-C-I	37	M	RR	NOGO	100	100	355.488	6.25	3.125	3.125	3.125	453.033	585.774	132.741	466.806	545.387	78.5806	820.933	958.871	137.938	837.581	922.387	84.8065	5	6	3
177	G-C-I	42	M	RR	GO	100	100	396.825	6.25	3.125	6.25	6.25	476.167	464.097	-12.0699	332.467	480.867	148.4	806.467	822.419	15.9527	665.133	828.4	163.267	3	3	2
40	N-I-C	42	F	RR	NOGO	100	99.375	425.481	0	3.125	6.25	6.25	929.75	951.097	21.3468	915.133	945.9	30.7667	1299.69	1283.9	-15.7843	1247.5	1322.27	74.7667	3	3	3
143	N-C-I	29	M	RR	NOGO	100	100	385.875	3.125	0	0	0	481.226	544.219	62.9929	505.031	507.375	2.34375	783.452	881.375	97.9234	824.5	804.094	-20.4062	5	6	4
96	N-I-C	25	F	RR	NOGO	100	100	351.394	0	6.25	0	0	419.719	528.067	108.348	435.25	508.812	73.5625	764.469	868.233	103.765	785.219	841.406	56.1875	7	2	6
175	N-C-I	44	M	RR	NOGO	99.375	100	392.459	0	0	0	0	528.875	580.875	52	518.469	577.938	59.4688	942.469	974.5	32.0312	918.781	987.312	68.5312	6	4	4
176	N-I-C	42	M	RR	NOGO	100	100	403.062	0	0	0	0	487.094	463.344	-23.75	448.938	479.844	30.9062	798.469	773.875	-24.5938	757.312	799.719	42.4062	5	3	3
168	N-I-C	33	M	RR	NOGO	99.375	99.375	447.421	3.125	0	0	6.25	533.29	547.312	14.0222	496.656	614.033	117.377	802.968	799.625	-3.34274	755.656	870.767	115.11	5	6	4
180	N-I-C	41	M	RR	NOGO	100	100	383.281	3.125	0	6.25	0	428.226	540.781	112.555	489.933	552.594	62.6604	864.742	1018.97	154.227	945.867	967.156	21.2896	3	4	5
159	N-C-I	36	M	RR	NOGO	100	100	386.413	0	0	0	0	400.844	496.781	95.9375	397.25	481.969	84.7188	797.188	872.938	75.75	779.344	874.031	94.6875	6	3	2
81	G-C-I	47	F	RR	GO	100	100	346.05	0	0	0	0	555.125	554.469	-0.65625	510.906	573.562	62.6562	947.406	935.5	-11.9062	897.594	962.531	64.9375	5	5	4
91	N-C-I	50	F	RR	NOGO	100	100	438.825	0	0	0	0	591.25	709.531	118.281	546.906	728.562	181.656	925.75	1047.12	121.375	851.875	1100.53	248.656	3	5	4
125	G-C-I	46	M	RR	GO	100	100	413.444	3.125	0	0	0	504.871	648.312	143.442	556.5	597.344	40.8438	931.387	1069.47	138.082	976.375	1026.84	50.4688	5	3	4
85	G-C-I	62	M	RR	GO	99.375	99.375	542.761	0	6.25	25	9.375	868.812	1099.77	230.954	994.75	1065.52	70.7672	1550.66	1697.37	146.71	1618.62	1690.55	71.9267	6	6	7
172	N-I-C	46	F	RR	NOGO	100	99.375	449.1	0	0	0	3.125	312.531	551.688	239.156	402.781	516.161	113.38	722.969	936.156	213.188	787.531	936.032	148.501	3	5	6
169	G-C-I	42	F	RR	GO	100	100	448.8	0	0	0	0	586	579.406	-6.59375	587.906	634.781	46.875	972.062	956.531	-15.5312	960.406	1030.03	69.625	5	5	4
134	G-I-C	54	M	RR	GO	100	100	488.069	0	0	0	3.125	550.469	691.25	140.781	579	582.161	3.16129	967.312	1134.88	167.562	1029.56	1000.16	-29.4012	6	3	4
207	N-C-I	40	F	RR	NOGO	99.375	99.375	362.855	12.5	3.125	6.25	0	462.321	439.484	-22.8376	387.867	451.25	63.3833	791.821	758.29	-33.5311	691.667	776.625	84.9583	5	5	3
166	G-I-C	30	M	RR	GO	100	100	417.356	0	6.25	0	0	655.156	638.767	-16.3896	633.094	716.344	83.25	967.781	991.167	23.3854	983.125	1031.72	48.5938	3	2	7
137	G-C-I	53	M	RR	GO	100	100	400.156	3.125	6.25	0	3.125	641.419	654.4	12.9806	698.75	598.097	-100.653	1067.52	1036.4	-31.1161	1092.44	980.097	-112.341	6	4	3
105	G-C-I	61	M	LR	GO	100	100	392.444	21.875	9.375	15.625	12.5	434.28	575.517	141.237	479.148	441.964	-37.1839	968.84	997.379	28.5393	885.185	929.571	44.3862	4	5	3
230	G-I-C	42	M	LR	GO	100	99.375	343.775	0	3.125	0	0	352.469	424.742	72.2732	401.656	404.875	3.21875	705.469	789.323	83.8538	760.094	756.906	-3.1875	2	2	3
102	G-I-C	62	M	RR	GO	99.375	98.75	510.264	6.25	6.25	9.375	0	788.2	798.833	10.6333	966.414	799.375	-167.039	1270.13	1261.07	-9.06667	1440.21	1277.12	-163.082	4	4	5
245	G-C-I	40	F	RR	GO	100	100	475.863	0	9.375	6.25	9.375	707.969	649.172	-58.7963	729.267	722.621	-6.64598	1191.62	1121.38	-70.2457	1179.23	1192.93	13.6977	4	4	4
233	G-C-I	39	F	RR	GO	100	99.375	355.962	6.25	3.125	0	3.125	577.533	628.645	51.1118	583.281	619.226	35.9446	971.4	985.419	14.0194	939.906	1013.13	73.2228	6	3	5
239	N-C-I	45	M	RR	NOGO	100	100	371.269	3.125	0	3.125	6.25	533.258	668.031	134.773	610.839	571.167	-39.672	983.806	1039.91	56.0998	1015.55	989.433	-26.1151	5	5	3
248	N-I-C	32	M	RR	NOGO	98.75	100	423.835	3.125	0	0	0	538.742	561.219	22.4768	515.719	482.25	-33.4688	869.839	900.062	30.2238	852.625	812.531	-40.0938	2	4	6
199	N-C-I	35	F	RR	NOGO	100	98.75	373.444	3.125	3.125	0	3.125	441.065	551.387	110.323	390.375	609.935	219.56	867.452	918.613	51.1613	763.438	1042.9	279.466	5	5	6
232	N-I-C	54	M	RR	NOGO	100	100	411.294	0	0	0	9.375	629.344	605.094	-24.25	568.469	784.552	216.083	1104.41	1074.41	-30	1035.53	1255.66	220.124	3	4	5
228	N-I-C	63	M	RR	NOGO	99.375	100	541.164	3.125	0	0	3.125	686.129	852.062	165.933	749.938	784.742	34.8044	1219.81	1443.88	224.069	1339.28	1349.45	10.1704	5	3	4
198	G-I-C	45	F	RR	GO	100	99.375	372.163	0	0	0	3.125	487.594	602.469	114.875	459.906	574.065	114.158	924.406	1033.19	108.781	906.062	1008.94	102.873	4	4	4
265	G-C-I	30	M	RR	GO	100	100	404.631	6.25	3.125	3.125	3.125	497.167	663.452	166.285	576.839	526.774	-50.0645	813.833	986.258	172.425	875.194	862.258	-12.9355	4	3	5
249	G-C-I	37	M	RR	GO	100	99.375	410.919	0	3.125	0	0	560.656	655.323	94.6663	702.781	649.5	-53.2812	1051.69	1112.87	61.1835	1178.94	1135.75	-43.1875	5	3	3
221	G-C-I	50	M	RR	GO	100	100	472.581	0	0	0	0	483.594	555.094	71.5	616.5	576.344	-40.1562	872.438	905.594	33.1562	985.219	943.562	-41.6562	5	3	3
211	N-C-I	45	M	RR	NOGO	100	98.75	425.7	0	12.5	9.375	3.125	700.312	883.964	183.652	772.862	637.161	-135.701	1073.62	1242.93	169.304	1151.07	1005.58	-145.488	3	4	5
253	G-C-I	47	M	RR	GO	100	100	364.163	3.125	0	0	3.125	538.839	597.656	58.8175	532.188	536.516	4.32863	854.645	910.562	55.9173	848.031	871.968	23.9365	6	6	3
204	N-I-C	42	F	RR	NOGO	100	100	392.069	25	12.5	3.125	25	925.292	890.071	-35.2202	912.968	1037.21	124.241	1385.25	1379.25	-6	1378.65	1493.58	114.938	6	4	4
294	G-I-C	42	F	RR	GO	100	98.75	371.769	3.125	3.125	0	3.125	516.452	594.645	78.1935	471.844	608.935	137.092	847.871	945.613	97.7419	829.344	935.903	106.559	3	3	6
67	N-C-I	32	M	RR	NOGO	100	100	374.381	0	3.125	0	0	418.531	486.387	67.8558	412.625	448.781	36.1562	723.5	800.548	77.0484	714.875	762.875	48	6	5	5
68	N-I-C	46	M	RR	NOGO	100	100	392.469	0	3.125	6.25	0	628.594	633.161	4.56754	617.433	595.875	-21.5583	953.531	980.581	27.0494	960.833	936.906	-23.9271	4	6	5
107	N-C-I	48	F	RR	NOGO	100	98.125	414.875	3.125	3.125	6.25	0	873.29	758.71	-114.581	691.9	869.781	177.881	1280.03	1173.13	-106.903	1057.73	1239.38	181.642	6	7	6
156	N-I-C	38	M	RR	NOGO	100	100	402.944	0	6.25	0	0	476.562	564.167	87.6042	534.719	553.312	18.5938	802.281	875.233	72.9521	846.281	890.281	44	2	4	5
155	N-C-I	40	F	RR	NOGO	100	100	341.387	0	3.125	6.25	0	442.531	470.484	27.9526	448.967	489.531	40.5646	750.438	763.194	12.756	738.467	793.812	55.3458	5	5	4
188	N-I-C	44	F	LR	NOGO	100	100	385.481	0	0	0	6.25	596.906	711.906	115	664.344	576.933	-87.4104	904.969	1030.5	125.531	984.25	884.267	-99.9833	6	6	5
128	N-I-C	41	F	RR	NOGO	100	100	404.506	0	9.375	0	9.375	587.969	691.862	103.893	547.781	609.828	62.0463	934.406	1087.52	153.111	934.125	957.897	23.7716	1	5	2
130	G-I-C	26	F	RR	GO	100	100	433.825	0	6.25	3.125	3.125	718.344	774.367	56.0229	678.839	816.677	137.839	1157.31	1245.07	87.7542	1151.61	1263.23	111.613	6	5	5
192	N-I-C	32	F	RR	NOGO	100	98.125	468.262	6.25	0	0	3.125	624.633	518.781	-105.852	384.031	701.258	317.227	988.033	874.875	-113.158	733.594	1053.39	319.793	5	5	3
139	N-C-I	44	M	LR	NOGO	100	100	346.369	3.125	0	6.25	0	636.419	675.125	38.7056	579.233	623.844	44.6104	944.516	978.344	33.8276	883.433	942.156	58.7229	6	5	4
206	G-I-C	29	M	RR	GO	100	99.375	389.644	6.25	3.125	3.125	9.375	608.9	651.097	42.1968	497.226	622.897	125.671	962.167	991.129	28.9624	847.742	959.517	111.775	6	4	3
165	G-C-I	40	M	RR	GO	100	95	397.087	0	6.25	3.125	3.125	460.562	731.767	271.204	573.774	528.161	-45.6129	862.594	1189.7	327.106	992.871	948.581	-44.2903	4	4	5
197	G-C-I	47	F	RR	GO	100	100	366.45	0	0	0	3.125	469.719	421.031	-48.6875	425	547.645	122.645	783.375	730.875	-52.5	741.219	863.29	122.072	5	6	3
218	G-I-C	46	M	RR	GO	100	99.375	407.337	0	6.25	3.125	0	448.156	675.267	227.11	657.806	537.312	-120.494	792.094	1037.4	245.306	1026.58	911.562	-115.018	3	3	3
244	N-I-C	24	F	RR	NOGO	100	99.375	332.413	3.125	3.125	3.125	0	520.806	524.839	4.03226	475.774	533.188	57.4133	824.387	830	5.6129	792.323	850.031	57.7087	6	5	6
101	G-C-I	68	M	RR	GO	100	100	366.331	0	0	0	0	779.062	907.844	128.781	734.469	784.438	49.9688	1113.59	1244.56	130.969	1075.53	1126.84	51.3125	5	6	3
167	N-C-I	47	M	RR	NOGO	100	100	487.681	0	0	0	3.125	632.25	546.188	-86.0625	483.844	631.839	147.995	1078.94	927.906	-151.031	847.5	1095.74	248.242	4	5	2
160	N-I-C	28	M	RR	NOGO	100	100	354.462	0	3.125	0	0	458.438	592.29	133.853	546.906	584.344	37.4375	808.281	924.742	116.461	868.344	941.906	73.5625	3	4	3
142	G-I-C	55	M	RR	GO	100	98.75	375.444	3.125	0	0	3.125	828.452	704.438	-124.014	761.469	801.387	39.9183	1310.84	1193.62	-117.214	1268.12	1277.1	8.97177	2	3	5
31	N-C-I	48	M	RR	NOGO	100	100	393.531	0	3.125	3.125	3.125	483.406	490.806	7.4002	472.355	472.839	0.483871	817.844	864.935	47.0917	835	803.935	-31.0645	3	5	4
194	G-I-C	52	M	RR	GO	100	100	434.225	0	0	0	0	588.812	697.875	109.062	625.125	720.406	95.2812	828.875	979.5	150.625	888.969	975.719	86.75	3	4	2
126	G-I-C	47	F	RR	GO	100	100	461.163	18.75	0	6.25	9.375	893.846	790	-103.846	766.2	725	-41.2	1279.27	1187.69	-91.5817	1165.3	1121.1	-44.1966	5	4	4
212	N-I-C	49	M	RR	NOGO	100	99.375	327.475	0	0	0	0	355.031	348.969	-6.0625	369.25	365.969	-3.28125	598.25	602.562	4.3125	611.844	609.844	-2	6	1	1
229	G-C-I	53	M	RR	GO	100	99.375	418.369	3.125	6.25	3.125	6.25	546.677	593.633	46.9559	621.71	625.2	3.49032	886.742	930.767	44.0247	960.452	965.033	4.58172	3	5	4
222	G-I-C	32	F	RR	GO	100	100	447.488	3.125	0	0	0	733.032	706.562	-26.4698	653.688	774.375	120.688	1051.9	1036.97	-14.9345	981.375	1086	104.625	2	6	3
259	N-C-I	46	M	RR	NOGO	100	100	488.738	0	0	0	0	480.469	534.281	53.8125	447.719	478.969	31.25	893.375	942.375	49	840.594	874.5	33.9062	3	5	4
238	G-I-C	34	M	RR	GO	100	99.375	423.788	0	0	0	0	432.406	514.938	82.5312	416.938	427.062	10.125	799.969	891.031	91.0625	800.938	784.125	-16.8125	5	2	2
219	N-C-I	52	M	RR	NOGO	100	100	368.65	9.375	3.125	6.25	0	514.862	452.323	-62.5395	460.2	543.156	82.9563	892.69	833.032	-59.6574	836.167	915.281	79.1146	3	5	1
254	G-I-C	48	F	RR	GO	100	99.375	365.519	3.125	3.125	0	0	512.806	618.484	105.677	577.719	588.562	10.8438	844	986.484	142.484	937.375	916.031	-21.3438	6	2	2
231	N-C-I	52	F	RR	NOGO	100	100	376.688	0	0	0	0	703.375	683.344	-20.0312	681.375	714.812	33.4375	1093.03	1052.44	-40.5938	1054.59	1090.06	35.4688	5	5	4
234	G-I-C	42	M	RR	GO	100	97.5	443.931	28.125	96.875	3.125	9.375	716.609	687	-29.6087	381.935	723.276	341.34	1163.7	1078	-85.6957	798.032	1150.79	352.761	3	3	4
258	G-I-C	38	F	RR	GO	100	99.375	434.875	3.125	0	0	3.125	793.323	697.094	-96.2288	706.094	902.903	196.809	1412.06	1253.66	-158.408	1270.69	1489.39	218.7	2	7	2
246	G-I-C	47	F	RR	GO	100	100	382.275	3.125	0	0	6.25	784	755.719	-28.2812	757.188	792.733	35.5458	1108.77	1097.22	-11.5554	1094.16	1113.57	19.4104	5	5	3
243	N-C-I	45	M	RR	NOGO	100	100	451.35	0	0	0	0	620.812	559.281	-61.5312	504.562	597.875	93.3125	963.031	904.875	-58.1562	841.594	931.031	89.4375	6	6	5
261	G-C-I	35	F	RR	GO	99.375	100	432.736	0	0	0	0	607.031	627.531	20.5	634.562	669.562	35	1016.12	1026.22	10.0938	1037.66	1077.56	39.9062	5	4	5
251	N-C-I	39	M	RR	NOGO	100	100	407.938	3.125	3.125	6.25	0	634.355	684.645	50.2903	704.4	684.219	-20.1812	1012.74	1070.84	58.0968	1081.63	1056.97	-24.6646	5	6	4
225	G-C-I	58	F	RR	GO	100	100	536.519	3.125	6.25	3.125	6.25	988.419	993.6	5.18065	979.774	1022.07	42.2925	1340.03	1349.73	9.70108	1321.84	1390.07	68.228	4	2	3
215	N-C-I	45	M	LL	NOGO	99.375	95.625	437.541	6.25	0	6.25	6.25	707	844.031	137.031	758.167	747.2	-10.9667	1499.77	1613.53	113.765	1527.47	1530.67	3.2	3	4	4
283	N-C-I	30	M	LR	NOGO	100	100	401.844	0	0	3.125	0	480.688	570.375	89.6875	443.258	586.031	142.773	782.406	878.375	95.9688	748.419	880.531	132.112	5	6	4
280	N-I-C	51	M	RR	NOGO	100	100	381.462	0	0	0	0	381.438	526.062	144.625	461.531	533.844	72.3125	770.938	927.156	156.219	877.906	920.031	42.125	2	2	2
304	N-I-C	34	M	RR	NOGO	100	100	428.875	0	0	0	0	429.562	513.312	83.75	431.438	558.531	127.094	787.781	849.75	61.9688	776.188	918.5	142.312	1	4	1
300	N-I-C	52	F	RR	NOGO	100	100	361.344	6.25	3.125	3.125	3.125	788.367	770.903	-17.4634	780.516	732.839	-47.6774	1106.8	1096.13	-10.671	1091.52	1074.26	-17.2581	5	4	5
284	N-I-C	32	F	RR	NOGO	99.375	100	402.484	0	0	0	0	511.938	555.312	43.375	550.781	549.062	-1.71875	1007.09	1053.81	46.7188	1058.72	1037.5	-21.2188	5	3	6
196	N-I-C	49	F	RR	NOGO	100	100	340.825	0	0	0	3.125	362.344	525.562	163.219	472.312	473.774	1.46169	720.438	945.656	225.219	894.312	829.806	-64.506	4	4	6
307	N-C-I	33	M	RR	NOGO	100	100	422.238	0	0	0	0	549.219	555.844	6.625	542.344	566.75	24.4062	838.5	855.188	16.6875	845.406	844.188	-1.21875	5	4	5
312	N-I-C	56	M	RR	NOGO	100	99.375	375.212	9.375	3.125	0	3.125	459.552	538.129	78.5773	391.281	379.935	-11.3458	831.276	933.452	102.176	766.25	770.677	4.42742	4	7	6
311	N-C-I	42	M	RR	NOGO	100	100	454.188	0	0	0	0	658.875	606.25	-52.625	547.188	628.844	81.6562	985.875	926.781	-59.0938	865.281	960.031	94.75	2	7	2
317	G-C-I	42	M	RR	GO	100	100	438.081	0	3.125	0	0	438.781	513.355	74.5736	423.625	513.188	89.5625	791.812	861.645	69.8327	768.531	854.188	85.6562	5	4	5
323	N-C-I	45	M	RR	NOGO	100	100	389.719	0	0	0	0	733.906	711.906	-22	657.531	713.469	55.9375	1084.97	1016.06	-68.9062	973.531	1038.75	65.2188	4	5	4
170	G-I-C	30	M	RR	GO	100	99.375	327.169	0	0	6.25	0	371.281	417.469	46.1875	406.1	461.719	55.6187	696.781	737.531	40.75	727.1	785.531	58.4312	3	3	2
313	G-C-I	34	M	RR	GO	100	99.375	396.962	6.25	0	0	6.25	565.433	510.75	-54.6833	348.594	407.333	58.7396	913.4	871.125	-42.275	695.031	732.3	37.2687	6	2	7
335	N-C-I	37	F	RR	NOGO	100	100	314.562	3.125	0	0	0	399.774	423.469	23.6946	347.344	440.844	93.5	766.839	778.031	11.1925	705.188	804.219	99.0312	3	5	4
339	N-C-I	49	M	LL	NOGO	100	99.375	433.675	0	6.25	0	6.25	615.875	653.267	37.3917	573.75	667.067	93.3167	972.219	1047.07	74.8479	925.281	1033.83	108.552	4	5	3
345	G-C-I	48	F	RR	GO	100	100	437.044	0	0	6.25	3.125	575.438	586.875	11.4375	554.667	569.968	15.3011	936.188	950.812	14.625	893.033	911.258	18.2247	2	5	4
303	N-C-I	47	F	RR	NOGO	100	100	473.725	12.5	3.125	3.125	15.625	771.321	681.71	-89.6118	560	908.074	348.074	1213.64	1096.84	-116.804	1025.97	1343.56	317.588	3	6	4
341	G-C-I	47	M	RR	GO	100	100	541.138	3.125	3.125	0	3.125	826.968	763.935	-63.0323	761.844	865.968	104.124	1164	1074.61	-89.3871	1082.44	1188.68	106.24	5	5	4
376	N-I-C	43	F	RR	NOGO	100	100	458.906	0	0	0	0	557.938	706.406	148.469	668.281	521.375	-146.906	882.875	1024.5	141.625	977.844	824.094	-153.75	5	5	4
379	N-C-I	37	M	RR	NOGO	100	100	469.944	0	0	0	0	492.969	606.812	113.844	576.688	575.781	-0.90625	855.719	937.938	82.2188	911.094	920.281	9.1875	5	4	6
380	N-I-C	55	F	RR	NOGO	100	99.375	408.462	3.125	6.25	0	3.125	826.032	709.8	-116.232	819.594	780.065	-39.5292	1222.74	1129.17	-93.5753	1228.53	1204.03	-24.499	6	3	4
395	N-C-I	37	F	RR	NOGO	100	100	392.006	0	0	0	0	571.469	566.438	-5.03125	510.625	663.094	152.469	964	933.281	-30.7188	905.312	1047.56	142.25	5	5	4
398	G-I-C	47	M	LR	GO	100	100	407.325	0	0	0	0	459.094	565.469	106.375	494.406	477.375	-17.0312	789.719	906	116.281	835.656	802.625	-33.0312	6	3	5
397	G-C-I	39	F	RR	GO	100	100	357.2	0	3.125	0	3.125	412.438	452.935	40.498	428.344	512.968	84.624	723.844	765.355	41.5111	738.938	828.581	89.6431	4	5	4
377	G-C-I	32	M	RR	GO	100	98.75	506.075	3.125	0	0	0	647	729.625	82.625	603.938	709.656	105.719	993.548	1086.97	93.4204	953.344	1045.66	92.3125	6	4	3
403	N-C-I	23	F	RR	NOGO	100	100	374.019	46.875	3.125	0	46.875	585.294	592.129	6.83491	613.312	658.882	45.5699	902.353	911.839	9.48577	917.375	982.882	65.5074	6	6	6
414	G-I-C	30	F	RR	GO	100	98.125	392.456	3.125	0	0	3.125	563.032	631.406	68.374	474.812	667.645	192.833	926	983.406	57.4062	836.75	1020.81	184.056	3	3	3
404	N-I-C	39	M	RR	NOGO	79.375	98.75	458.543	6.25	0	0	3.125	505.867	488.562	-17.3042	458.344	518.097	59.753	893.667	903.469	9.80208	853.344	909.645	56.3014	3	3	4
402	G-I-C	59	F	RR	GO	100	100	387.562	6.25	0	6.25	3.125	1067.6	976.188	-91.4125	919.967	1065.32	145.356	2001.77	2018.38	16.6083	1898.23	1995.94	97.7022	5	4	6
413	G-C-I	28	M	LL	GO	100	100	399.619	3.125	0	3.125	0	672.097	858.938	186.841	784.548	699.625	-84.9234	1156.94	1332.81	175.877	1252.16	1190.59	-61.5675	4	3	2
433	G-C-I	47	F	RR	GO	100	99.375	549.812	6.25	3.125	0	6.25	579.1	579.774	0.674194	537.719	624.833	87.1146	993.833	1002.45	8.61828	947.344	1045.73	98.3896	2	6	5
419	N-C-I	29	F	RR	NOGO	100	100	429.913	0	0	0	6.25	422.312	527.719	105.406	496.5	477.733	-18.7667	735.031	823.25	88.2188	789.594	780.4	-9.19375	4	5	3
408	N-I-C	48	F	RR	NOGO	100	100	433.6	3.125	0	0	0	669.903	666.25	-3.65323	703.594	668.062	-35.5312	982.742	991.469	8.72681	1017.62	983.156	-34.4688	4	5	3
435	N-C-I	42	M	LR	NOGO	100	100	452.106	3.125	6.25	6.25	9.375	726.839	908.9	182.061	656.433	918.621	262.187	1307.39	1415.63	108.246	1143.57	1549.72	406.157	6	5	3
443	N-C-I	35	F	RR	NOGO	100	99.375	370.169	0	3.125	0	0	369.5	489.387	119.887	418.562	519.781	101.219	713.25	791.71	78.4597	795.125	848.812	53.6875	4	6	5
429	G-C-I	37	M	RR	GO	100	100	386.631	3.125	0	6.25	6.25	475.613	700.719	225.106	571.633	624.367	52.7333	1010.77	1141.59	130.82	1009.23	1165.97	156.733	7	5	3
446	G-I-C	22	M	RR	GO	100	100	431.081	3.125	0	0	6.25	860.935	818.625	-42.3105	760.125	857.5	97.375	1611.77	1668.16	56.3821	1593.66	1652	58.3438	5	4	3
445	G-C-I	44	M	RR	GO	100	96.25	387.9	0	3.125	3.125	6.25	454.906	448.742	-6.16431	404.613	511.267	106.654	844.125	817.323	-26.8024	763.387	899.967	136.58	3	4	5
411	N-C-I	65	F	RR	NOGO	98.75	100	515.127	90.625	43.75	18.75	3.125	1304.33	1224.22	-80.1111	1122.35	1032.55	-89.7978	1899.67	1697.78	-201.889	1601.77	1572.61	-29.1563	6	5	3
456	N-I-C	46	F	LR	NOGO	100	100	479.075	3.125	0	3.125	0	602.613	680.156	77.5433	699.355	600.844	-98.5111	1027.58	1139.59	112.013	1142.81	1032.66	-110.15	4	4	4
461	G-C-I	53	F	RR	GO	100	100	390.219	3.125	0	3.125	0	776.968	710.125	-66.8427	695.129	712.938	17.8085	1183.77	1093.75	-90.0242	1089.65	1127.69	38.0423	5	5	3
462	G-I-C	34	M	RR	GO	100	99.375	320.725	0	3.125	3.125	3.125	327.312	410.097	82.7843	374.71	392.387	17.6774	668.75	749.935	81.1855	714.903	738.419	23.5161	4	6	5
465	G-C-I	42	F	RR	GO	100	99.375	440.062	3.125	0	3.125	3.125	599.903	769.062	169.159	685.581	678.226	-7.35484	956.29	1081.06	124.772	1020.26	1017.84	-2.41935	3	4	5
474	G-I-C	42	F	RR	GO	100	99.375	377.562	0	6.25	0	6.25	475.75	451.2	-24.55	362.844	552.1	189.256	798.531	777.333	-21.1979	685	881.933	196.933	5	2	4
475	N-C-I	39	M	RR	NOGO	100	100	417.106	0	3.125	0	0	529.656	556.484	26.8276	566.281	579.406	13.125	1032.66	1038.84	6.18246	1054.03	1087.78	33.75	4	4	3
476	N-I-C	42	M	RR	NOGO	100	100	324.494	0	0	0	6.25	412.531	568.938	156.406	503.719	528.2	24.4813	756.344	931.406	175.062	872.969	866.667	-6.30208	5	5	5
478	G-I-C	44	F	RR	GO	100	100	415.938	6.25	3.125	0	0	710.733	620.839	-89.8946	584.25	732.375	148.125	1073.2	975.484	-97.7161	945.594	1089.19	143.594	4	7	2
236	N-I-C	38	M	RR	NOGO	100	100	396.194	0	3.125	0	0	486.75	559.645	72.8952	532.906	558.219	25.3125	899.219	988.613	89.3942	946.406	972.25	25.8438	5	4	6
235	N-C-I	41	M	RR	NOGO	100	98.75	403.087	3.125	3.125	6.25	3.125	553.194	575.742	22.5484	506.433	669.677	163.244	991.71	980.032	-11.6774	901.6	1112.45	210.852	4	4	4
182	G-I-C	51	M	RR	GO	100	100	386.269	6.25	0	0	6.25	708.6	740.188	31.5875	586.781	736.933	150.152	1036.87	1105.78	68.9146	950	1096.07	146.067	5	1	6
287	N-C-I	43	F	RR	NOGO	100	98.75	421.325	0	0	3.125	0	620.938	635.938	15	527.355	676.969	149.614	1047.66	1035.56	-12.0938	922.129	1094.12	171.996	6	6	2
301	G-C-I	50	M	RR	GO	99.375	100	510.843	0	0	0	0	464.812	542.469	77.6562	377.438	610.594	233.156	793.312	868	74.6875	708.781	943.125	234.344	6	5	4
325	G-C-I	64	F	RR	GO	99.375	98.75	393.377	0	3.125	0	0	468.938	497.129	28.1915	521.312	421.75	-99.5625	814.625	835.355	20.7298	865.625	758.094	-107.531	6	5	4
321	G-C-I	42	M	RR	GO	100	100	411.144	0	6.25	0	0	442.469	481.033	38.5646	446.562	460.812	14.25	765.844	795.233	29.3896	757.312	787.75	30.4375	7	5	3
324	N-I-C	57	F	RR	NOGO	100	100	478.269	9.375	9.375	0	12.5	831.483	667.207	-164.276	616.25	796.25	180	1312.79	1136.59	-176.207	1113.81	1252.82	139.009	5	6	3
319	N-C-I	34	F	RR	NOGO	99.375	99.375	451.396	3.125	0	0	3.125	586.903	578.406	-8.49698	566.406	621.484	55.0776	1015.9	1000.12	-15.7782	973	1057.68	84.6774	5	4	5
322	G-I-C	44	F	RR	GO	100	100	481.312	0	3.125	0	0	478.062	656.742	178.679	617.812	581.156	-36.6562	880.906	1073.42	192.513	1049.69	995.281	-54.4062	4	4	3
331	N-C-I	41	F	RR	NOGO	100	100	433.681	3.125	0	6.25	0	625.548	565.562	-59.9859	557.767	621.312	63.5458	1058.84	930.875	-127.964	930.333	1032.88	102.542	6	3	5
316	N-I-C	61	F	RR	NOGO	100	97.5	400.781	3.125	0	0	0	715.774	813.625	97.8508	869.344	609.625	-259.719	1191	1297.62	106.625	1346.75	1090.31	-256.438	5	3	3
299	N-C-I	36	M	RR	NOGO	100	100	414.856	3.125	0	0	3.125	583.065	582.812	-0.252016	523.5	602.355	78.8548	909.516	903.344	-6.17238	830.531	929.323	98.7913	1	2	5
117	G-C-I	54	F	RR	GO	100	100	404.45	0	9.375	0	0	629.531	710.414	80.8825	591.719	715.688	123.969	1086.88	1142	55.125	1030.38	1163.38	133	6	5	2
289	G-C-I	57	F	RR	GO	100	99.375	394.012	3.125	3.125	3.125	0	712.774	627.871	-84.9032	694.581	580.625	-113.956	1065.9	969.71	-96.1935	1044.32	959.75	-84.5726	4	4	4
336	N-I-C	50	F	RR	NOGO	100	100	411.188	0	3.125	3.125	3.125	540.562	586.516	45.9536	522.065	534.129	12.0645	923.688	992.968	69.2802	900.484	945.548	45.0645	3	6	3
333	G-C-I	39	M	LR	GO	100	98.125	353.312	6.25	6.25	0	6.25	451.867	466.8	14.9333	347.812	417.033	69.2208	831.8	857.1	25.3	726	804.933	78.9333	3	6	3
320	N-I-C	41	M	RR	NOGO	100	100	448.525	6.25	0	0	3.125	730.5	684	-46.5	512.75	821.71	308.96	1099.13	1081.59	-17.5396	907.688	1208.87	301.183	5	6	6
359	N-C-I	34	M	RR	NOGO	100	100	407.975	0	0	0	0	464.156	486.031	21.875	430.375	495.812	65.4375	759.188	770.188	11	722.594	786.188	63.5938	5	6	5
365	G-C-I	47	F	RR	GO	100	100	414.944	3.125	0	0	0	437.71	689.219	251.509	653.031	572.5	-80.5312	888.806	1081.25	192.444	1088.16	990.562	-97.5938	5	4	3
378	G-I-C	52	M	LR	GO	100	99.375	355.863	3.125	3.125	3.125	0	545.742	541.935	-3.80645	513.097	573.688	60.5907	871.097	886.806	15.7097	831.484	900.875	69.3911	4	6	5
387	N-C-I	44	F	RR	NOGO	100	100	390.594	0	0	0	0	566.188	634.969	68.7812	558.25	723	164.75	1054.25	1127.69	73.4375	1051.47	1216.81	165.344	3	4	6
390	G-I-C	46	M	RR	GO	100	96.875	374.225	0	3.125	0	0	428.812	540.387	111.575	463.75	518.906	55.1562	808.438	934.387	125.95	861.719	897.906	36.1875	5	3	3
394	G-I-C	33	F	LR	GO	100	100	329.525	0	0	3.125	0	448.688	610.875	162.188	433.355	544.938	111.583	751.125	930.406	179.281	737.419	857.688	120.268	4	4	3
381	G-C-I	50	M	RR	GO	91.25	98.125	498.788	6.25	0	9.375	0	592.633	869	276.367	711.862	748.969	37.1067	969.033	1223.25	254.217	1079.34	1125.69	46.3427	3	2	1
400	N-I-C	40	M	RR	NOGO	100	100	488.606	0	0	0	6.25	521.156	558.344	37.1875	530.812	624.067	93.2542	825.844	998.844	173	976.281	959.533	-16.7479	5	4	3
401	G-C-I	48	F	RR	GO	100	100	412.156	0	6.25	0	3.125	540.312	690.467	150.154	603	550.161	-52.8387	994.188	1122.4	128.213	1038.25	1005.87	-32.379	7	5	3
415	N-C-I	39	F	RR	NOGO	99.375	99.375	471.943	3.125	0	3.125	0	619.194	708.469	89.2752	654.516	723.469	68.9526	1050.06	1140.22	90.1542	1088.71	1158.94	70.2278	5	4	5
420	N-I-C	30	F	RR	NOGO	100	100	397.312	0	0	0	0	561.719	743.969	182.25	814.219	749.594	-64.625	1022.47	1195.41	172.938	1258.59	1188.44	-70.1562	3	4	3
412	N-I-C	40	F	RR	NOGO	99.375	100	356.409	0	0	0	3.125	578.281	521.156	-57.125	535.438	573.452	38.0141	966.688	884.281	-82.4062	946.156	960.484	14.3276	2	6	7
424	N-I-C	52	M	RR	NOGO	100	100	335.219	0	3.125	0	0	355.688	505.065	149.377	493.219	470.125	-23.0938	656.75	825.903	169.153	798.094	770.938	-27.1562	5	6	5
430	G-I-C	41	M	RR	GO	100	99.375	448.481	0	0	0	0	524.781	606.344	81.5625	582.031	640.656	58.625	882.344	957.062	74.7188	937.688	996.281	58.5938	2	2	4
431	N-C-I	50	F	RR	NOGO	100	99.375	437.062	3.125	0	0	0	629.806	551.031	-78.7752	540.375	603.656	63.2812	1052.23	991.094	-61.1321	968.844	1028.69	59.8438	5	6	4
437	G-C-I	38	M	RR	GO	100	100	429.394	0	0	0	0	504.344	564.062	59.7188	496.812	551.5	54.6875	917.719	934.531	16.8125	864.375	959.344	94.9688	4	2	1
438	G-I-C	57	F	RR	GO	100	100	373.819	0	0	3.125	0	479.656	638.969	159.312	523.194	526.906	3.7127	919.281	1144.19	224.906	985.613	1013.97	28.3558	3	3	4
410	G-I-C	66	M	RR	GO	100	100	372.481	0	15.625	0	0	753.031	932.148	179.117	783.969	972.844	188.875	1182.75	1427.7	244.954	1283.09	1444.78	161.688	5	6	3
447	N-C-I	33	M	RR	NOGO	100	99.375	342.663	0	0	3.125	3.125	443.469	523.906	80.4375	502.323	470.355	-31.9677	751.031	862.375	111.344	882.29	804.581	-77.7097	6	4	3
450	G-I-C	38	M	RR	GO	96.25	98.75	398.734	6.25	3.125	3.125	3.125	401.133	569.065	167.931	363	573.258	210.258	829.933	976.581	146.647	736	969.806	233.806	5	3	4
388	N-I-C	35	M	RR	NOGO	100	100	388.344	0	3.125	0	0	407.75	463.065	55.3145	441.281	510.75	69.4688	704.344	752.71	48.3659	738.156	813.125	74.9688	5	5	3
453	G-C-I	60	M	RR	GO	100	100	402.006	3.125	15.625	3.125	3.125	904.903	1023.11	118.208	952.613	843.839	-108.774	1650.61	1836	185.387	1749.97	1630.58	-119.387	4	3	4
463	N-C-I	58	F	RR	NOGO	100	98.75	430.194	3.125	3.125	3.125	0	734.581	782.129	47.5484	714.129	798.438	84.3085	1341.42	1355.61	14.1935	1297.74	1396.97	99.2268	6	3	6
464	N-I-C	36	M	RR	NOGO	100	100	382.719	0	3.125	0	0	443.688	485.452	41.7641	489.312	547.062	57.75	828.688	841.839	13.1512	838.156	922.844	84.6875	5	3	6
469	G-C-I	38	F	RR	GO	100	100	383.131	3.125	3.125	3.125	3.125	645.516	686.774	41.2581	639.032	726.29	87.2581	1029.84	1120.55	90.7097	1074.84	1108.71	33.871	7	6	2
470	G-I-C	47	M	RR	GO	100	90.625	326.319	3.125	3.125	3.125	6.25	415.129	459.032	43.9032	405.516	476.933	71.4172	734.548	759.935	25.3871	715	770.433	55.4333	6	3	4
